# Supplementary material for: Antimicrobial Behavior and Cytotoxicity of Indocyanine Green in Combination with Visible Light and Water-Filtered Infrared A Radiation against Periodontal Bacteria and Subgingival Biofilm
Source: MDPI journal article supplement (doi:10.3390/biomedicines10050956), 2022-04-20
Supplement: s1 [file s1]

Article

# Antimicrobial behavior and cytotoxicity of indocyanine green in combination with visible light and water-filtered infrared A radiation against periodontal bacteria and subgingival biofilm

Diana Lorena Guevara Solarte <sup>1,†</sup>, Sibylle Johanna Rau <sup>1,†</sup>, Elmar Hellwig <sup>1</sup>, Kirstin Vach <sup>2</sup> and Ali Al-Ahmad <sup>1,\*</sup>

<sup>1</sup> Department of Operative Dentistry and Periodontology, Medical Center of the University of Freiburg, Faculty of Medicine, University of Freiburg, Hugstetter Strasse 55, 79106 Freiburg, Germany; diana.lorena.guevara.solarte@uniklinik-freiburg.de (D.L.G.S); sibylle.rau@uniklinik-freiburg.de (S.R.); elmar.hellwig@uniklinik-freiburg.de (E.H.)

<sup>2</sup> Institute of Medical Biometry and Statistics, Faculty of Medicine and Medical Center, University of Freiburg, Stefan-Meier-Str. 26, D-79104 Freiburg, Germany, kv@imbi.uni-freiburg.de (K.V.)

† These authors contributed equally to this work

\* Correspondence: ali.al-ahmad@uniklinik-freiburg.de; Tel.: +49-761-270-48940

**Table S1:** GC-HP medium: GC-HP-Bouillon is a culture medium that has been used for anaerobic bacteria prior to the determination of fatty acid composition of the cell envelope using a gas chromatograph (Hewlett Packard, Agilent Technologies, Poway, CA, USA).

| Component                                   | Company         | Quantity |
|---------------------------------------------|-----------------|----------|
| Peptone from casein pancreatically digested | Merck 1.07213   | 2.5 g    |
| Trypticase peptone                          | BBL 11921       | 2.5 g    |
| Yeast extract                               | Difco 0127-17-9 | 5 g      |
| Resazurin solution                          | Serva 34226     | 2 ml     |
| Saline solution                             |                 | 20 ml    |
| Glucose                                     | Merck 8342      | 5 g      |
| Aqua dest                                   |                 | 500 ml   |
| Hemin solution 0.1 %                        | Serva 24410     | 2.5 ml   |
| Vitamin K1 1%                               | Sigma V-3501    | 0.05 ml  |
| Cysteine hydrochloride                      | Serva 17769     | 0.25 g   |

**Table S2:** Basis medium is a peptone-yeast medium.

| Component                                   | Company         | Quantity |
|---------------------------------------------|-----------------|----------|
| Peptone from casein pancreatically digested | Merck 1.07213   | 10 g     |
| NaCl                                        | Merck 1.06400   | 5 g      |
| Beef extract                                | Merck 3979      | 2 g      |
| Yeast extract                               | Difco 0127-17-9 | 5 g      |
| Cysteine hydrochloride                      | Serva 17769     | 0.3 g    |
| Aqua dest                                   |                 | 100 ml   |
